# Supplementary material for: Active immunoprophyilaxis with uromune® decreases the recurrence of urinary tract infections at three and six months after treatment without relevant secondary effects
Source: Springer Nature journal article supplement (doi:10.1186/s12879-019-4541-y), 2019-10-28
Supplement: MOESM1 [file 17319452]

```
COMPUTE EDAD=(CTIME.DAYS(FechaPrescripciónVacuna-FechaNacimiento)/365.25).
EXECUTE.
```

```
DESCRIPTIVES VARIABLES=EDAD
  /STATISTICS=MEAN STDDEV RANGE MIN MAX.
```

## Descriptives

### Notes

|                        |                                |                                                                                                                  |
|------------------------|--------------------------------|------------------------------------------------------------------------------------------------------------------|
| Output Created         |                                | 14-SEP-2019 23:15:28                                                                                             |
| Input                  | Data                           | C:<br>\Users\mm\Documents\CONGRESOS 2017 Treballs\EUROPEO LONDON 2017 VACUNAS UROMUNE\VACUNAS_Base Dades_BMC.sav |
|                        | Active Dataset                 | DataSet2                                                                                                         |
|                        | Filter                         | <none>                                                                                                           |
|                        | Weight                         | <none>                                                                                                           |
|                        | Split File                     | <none>                                                                                                           |
|                        | N of Rows in Working Data File | 784                                                                                                              |
| Missing Value Handling | Definition of Missing          | User defined missing values are treated as missing.                                                              |
|                        | Cases Used                     | All non-missing data are used.                                                                                   |
| Syntax                 |                                | DESCRIPTIVES<br>VARIABLES=EDAD<br>/STATISTICS=MEAN STDDEV ...                                                    |
| Resources              | Processor Time                 | 00:00:00,02                                                                                                      |
|                        | Elapsed Time                   | 00:00:00,01                                                                                                      |

```
[DataSet2] C:\Users\mm\Documents\CONGRESOS 2017 Treballs\EUROPEO LONDON 2017 VACUNAS UROMUNE\VACUNAS_Base Dades_BMC.sav
```

### Descriptive Statistics

|                    | N   | Range | Minimum | Maximum | Mean    | Std. Deviation |
|--------------------|-----|-------|---------|---------|---------|----------------|
| EDAD               | 784 | 78,11 | 19,23   | 97,33   | 73,5050 | 12,75228       |
| Valid N (listwise) | 784 |       |         |         |         |                |

```
COMPUTE EDAD50a=EDAD > 50.00.
EXECUTE.
```

```
FREQUENCIES VARIABLES=EDAD50a
```

/STATISTICS=RANGE MINIMUM MAXIMUM MEDIAN

/ORDER=ANALYSIS.

## Frequencies

### Notes

|                        |                                |                                                                                                                  |
|------------------------|--------------------------------|------------------------------------------------------------------------------------------------------------------|
| Output Created         |                                | 14-SEP-2019 23:15:28                                                                                             |
| Input                  | Data                           | C:<br>\Users\mm\Documents\CONGRESOS 2017 Treballs\EUROPEO LONDON 2017 VACUNAS UROMUNE\VACUNAS_Base Dades_BMC.sav |
|                        | Active Dataset                 | DataSet2                                                                                                         |
|                        | Filter                         | <none>                                                                                                           |
|                        | Weight                         | <none>                                                                                                           |
|                        | Split File                     | <none>                                                                                                           |
|                        | N of Rows in Working Data File | 784                                                                                                              |
| Missing Value Handling | Definition of Missing          | User-defined missing values are treated as missing.                                                              |
|                        | Cases Used                     | Statistics are based on all cases with valid data.                                                               |
| Syntax                 |                                | FREQUENCIES<br>VARIABLES=EDAD50a<br>/STATISTICS=RANGE MINIMUM MAXIMUM MEDIAN<br>/ORDER=ANALYSIS.                 |
| Resources              | Processor Time                 | 00:00:00,02                                                                                                      |
|                        | Elapsed Time                   | 00:00:00,02                                                                                                      |

### Statistics

EDAD50a

|         |         |      |
|---------|---------|------|
| N       | Valid   | 784  |
|         | Missing | 0    |
| Median  |         | 1,00 |
| Range   |         | 1    |
| Minimum |         | 0    |
| Maximum |         | 1    |

### EDAD50a

|       |                                 | Frequency | Percent | Valid Percent | Cumulative Percent |
|-------|---------------------------------|-----------|---------|---------------|--------------------|
| Valid | Edad inferior a 50 años         | 41        | 5,2     | 5,2           | 5,2                |
|       | Edad igual o superior a 50 años | 743       | 94,8    | 94,8          | 100,0              |
|       | Total                           | 784       | 100,0   | 100,0         |                    |

FREQUENCIES VARIABLES=BACTERIA

## Frequencies

### Notes

|                        |                                |                                                                                                                  |
|------------------------|--------------------------------|------------------------------------------------------------------------------------------------------------------|
| Output Created         |                                | 14-SEP-2019 23:15:28                                                                                             |
| Input                  | Data                           | C:<br>\Users\mm\Documents\CONGRESOS 2017 Treballs\EUROPEO LONDON 2017 VACUNAS UROMUNE\VACUNAS_Base Dades_BMC.sav |
|                        | Active Dataset                 | DataSet2                                                                                                         |
|                        | Filter                         | <none>                                                                                                           |
|                        | Weight                         | <none>                                                                                                           |
|                        | Split File                     | <none>                                                                                                           |
|                        | N of Rows in Working Data File | 784                                                                                                              |
| Missing Value Handling | Definition of Missing          | User-defined missing values are treated as missing.                                                              |
|                        | Cases Used                     | Statistics are based on all cases with valid data.                                                               |
| Syntax                 |                                | FREQUENCIES<br>VARIABLES=BACTERIA<br>/ORDER=ANALYSIS.                                                            |
| Resources              | Processor Time                 | 00:00:00,02                                                                                                      |
|                        | Elapsed Time                   | 00:00:00,02                                                                                                      |

### Statistics

BACTERIA

|   |         |     |
|---|---------|-----|
| N | Valid   | 784 |
|   | Missing | 0   |

### BACTERIA

|       |                  | Frequency | Percent | Valid Percent | Cumulative Percent |
|-------|------------------|-----------|---------|---------------|--------------------|
| Valid | E.Coli           | 380       | 48,5    | 48,5          | 48,5               |
|       | Klebsiella pn    | 273       | 34,8    | 34,8          | 83,3               |
|       | Proteus vulgaris | 81        | 10,3    | 10,3          | 93,6               |
|       | E. faecalis      | 50        | 6,4     | 6,4           | 100,0              |
|       | Total            | 784       | 100,0   | 100,0         |                    |

CROSSTABS

/TABLES=Sexo BY EDAD50a  
 /FORMAT=AVALUE TABLES  
 /CELLS=COUNT ROW COLUMN  
 /COUNT ROUND CELL.

**Crosstabs**

**Notes**

|                        |                                |                                                                                                                                 |
|------------------------|--------------------------------|---------------------------------------------------------------------------------------------------------------------------------|
| Output Created         |                                | 14-SEP-2019 23:15:28                                                                                                            |
| Input                  | Data                           | C:<br>\Users\mmm\Documents\CONGRESOS 2017 Treballs\EUROPEO LONDON 2017 VACUNAS UROMUNE\VACUNAS_Base Dades_BMC.sav               |
|                        | Active Dataset                 | DataSet2                                                                                                                        |
|                        | Filter                         | <none>                                                                                                                          |
|                        | Weight                         | <none>                                                                                                                          |
|                        | Split File                     | <none>                                                                                                                          |
|                        | N of Rows in Working Data File | 784                                                                                                                             |
| Missing Value Handling | Definition of Missing          | User-defined missing values are treated as missing.                                                                             |
|                        | Cases Used                     | Statistics for each table are based on all the cases with valid data in the specified range(s) for all variables in each table. |
| Syntax                 |                                | CROSSTABS<br>/TABLES=Sexo BY EDAD50a<br>/FORMAT=AVALUE TABLES<br>/CELLS=COUNT ROW COLUMN<br>/COUNT ROUND CELL.                  |
| Resources              | Processor Time                 | 00:00:00,02                                                                                                                     |
|                        | Elapsed Time                   | 00:00:00,13                                                                                                                     |
|                        | Dimensions Requested           | 2                                                                                                                               |
|                        | Cells Available                | 349496                                                                                                                          |

**Case Processing Summary**

|                | Cases |         |         |         |       |         |
|----------------|-------|---------|---------|---------|-------|---------|
|                | Valid |         | Missing |         | Total |         |
|                | N     | Percent | N       | Percent | N     | Percent |
| Sexo * EDAD50a | 784   | 100,0%  | 0       | 0,0%    | 784   | 100,0%  |

**Sexo \* EDAD50a Crosstabulation**

|       |                  |                  | EDAD50a                 |                                 | Total  |
|-------|------------------|------------------|-------------------------|---------------------------------|--------|
|       |                  |                  | Edad inferior a 50 años | Edad igual o superior a 50 años |        |
| Sexo  | Mujer            | Count            | 37                      | 611                             | 648    |
|       |                  | % within Sexo    | 5,7%                    | 94,3%                           | 100,0% |
|       |                  | % within EDAD50a | 90,2%                   | 82,2%                           | 82,7%  |
|       | Hombre           | Count            | 4                       | 132                             | 136    |
|       |                  | % within Sexo    | 2,9%                    | 97,1%                           | 100,0% |
|       |                  | % within EDAD50a | 9,8%                    | 17,8%                           | 17,3%  |
| Total | Count            | 41               | 743                     | 784                             |        |
|       | % within Sexo    | 5,2%             | 94,8%                   | 100,0%                          |        |
|       | % within EDAD50a | 100,0%           | 100,0%                  | 100,0%                          |        |

FREQUENCIES VARIABLES=ITUmes0 ITUmes3 ITUmes6  
 /BARCHART PERCENT  
 /ORDER=ANALYSIS.

**Frequencies**

**Notes**

|                        |                                |                                                                                                                   |
|------------------------|--------------------------------|-------------------------------------------------------------------------------------------------------------------|
| Output Created         |                                | 14-SEP-2019 23:15:28                                                                                              |
| Input                  | Data                           | C:<br>\Users\mmm\Documents\CONGRESOS 2017 Treballs\EUROPEO LONDON 2017 VACUNAS UROMUNE\VACUNAS_Base Dades_BMC.sav |
|                        | Active Dataset                 | DataSet2                                                                                                          |
|                        | Filter                         | <none>                                                                                                            |
|                        | Weight                         | <none>                                                                                                            |
|                        | Split File                     | <none>                                                                                                            |
|                        | N of Rows in Working Data File | 784                                                                                                               |
| Missing Value Handling | Definition of Missing          | User-defined missing values are treated as missing.                                                               |
|                        | Cases Used                     | Statistics are based on all cases with valid data.                                                                |
| Syntax                 |                                | FREQUENCIES<br>VARIABLES=ITUmes0 ITUmes3 ITUmes6<br>/BARCHART PERCENT<br>/ORDER=ANALYSIS.                         |
| Resources              | Processor Time                 | 00:00:05,25                                                                                                       |
|                        | Elapsed Time                   | 00:00:02,43                                                                                                       |

**Statistics**

|   |         | ITUmes0 | ITUmes3 | ITUmes6 |
|---|---------|---------|---------|---------|
| N | Valid   | 784     | 784     | 784     |
|   | Missing | 0       | 0       | 0       |

**Frequency Table**

**ITUmes0**

|       |    | Frequency | Percent | Valid Percent | Cumulative Percent |
|-------|----|-----------|---------|---------------|--------------------|
| Valid | 3  | 292       | 37,2    | 37,2          | 37,2               |
|       | 4  | 220       | 28,1    | 28,1          | 65,3               |
|       | 5  | 153       | 19,5    | 19,5          | 84,8               |
|       | 6  | 75        | 9,6     | 9,6           | 94,4               |
|       | 7  | 31        | 4,0     | 4,0           | 98,3               |
|       | 8  | 11        | 1,4     | 1,4           | 99,7               |
|       | 9  | 1         | ,1      | ,1            | 99,9               |
|       | 10 | 1         | ,1      | ,1            | 100,0              |
| Total |    | 784       | 100,0   | 100,0         |                    |

**ITUmes3**

|         | Frequency | Percent | Valid Percent | Cumulative Percent |
|---------|-----------|---------|---------------|--------------------|
| Valid 0 | 346       | 44,1    | 44,1          | 44,1               |
| 1       | 216       | 27,6    | 27,6          | 71,7               |
| 2       | 179       | 22,8    | 22,8          | 94,5               |
| 3       | 40        | 5,1     | 5,1           | 99,6               |
| 4       | 3         | ,4      | ,4            | 100,0              |
| Total   | 784       | 100,0   | 100,0         |                    |

**ITUmes6**

|         | Frequency | Percent | Valid Percent | Cumulative Percent |
|---------|-----------|---------|---------------|--------------------|
| Valid 0 | 253       | 32,3    | 32,3          | 32,3               |
| 1       | 254       | 32,4    | 32,4          | 64,7               |
| 2       | 182       | 23,2    | 23,2          | 87,9               |
| 3       | 86        | 11,0    | 11,0          | 98,9               |
| 4       | 6         | ,8      | ,8            | 99,6               |
| 5       | 3         | ,4      | ,4            | 100,0              |
| Total   | 784       | 100,0   | 100,0         |                    |

**Bar Chart**

ITUmes0

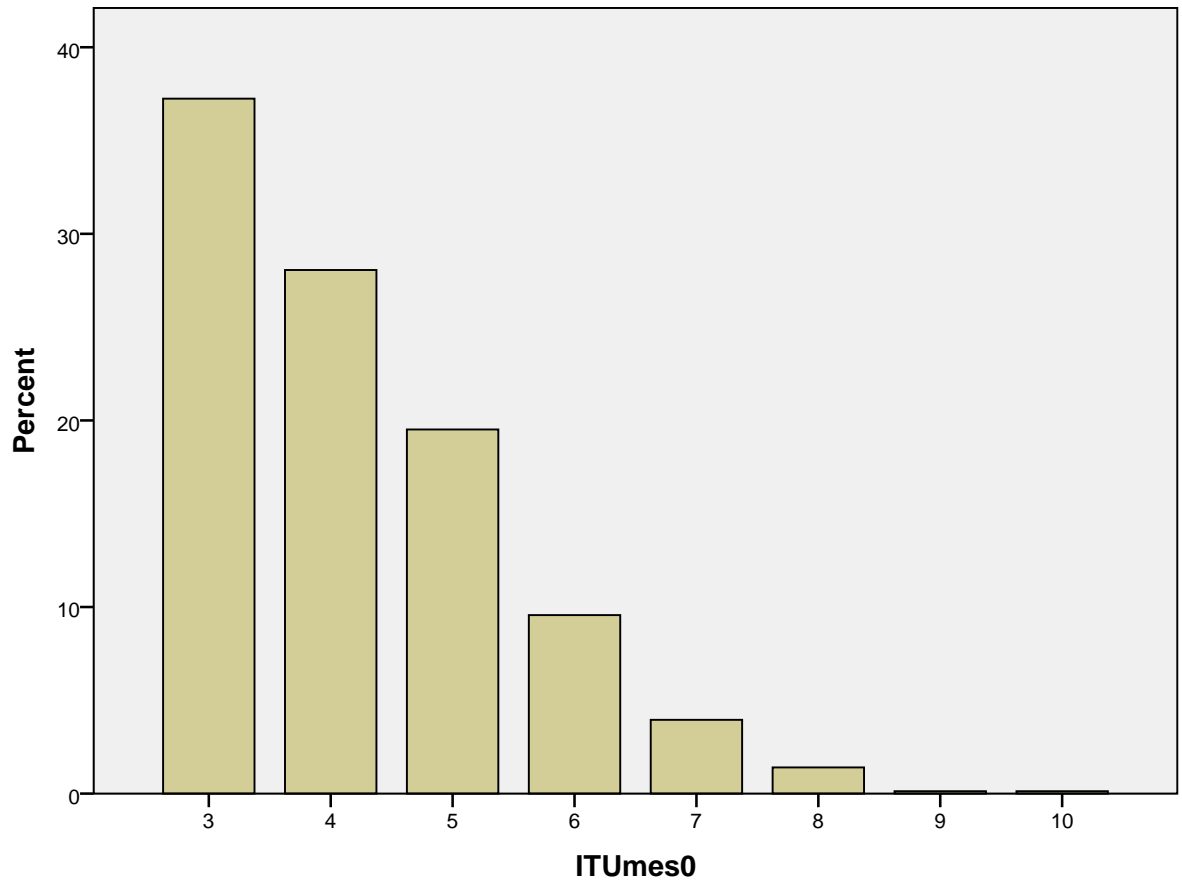



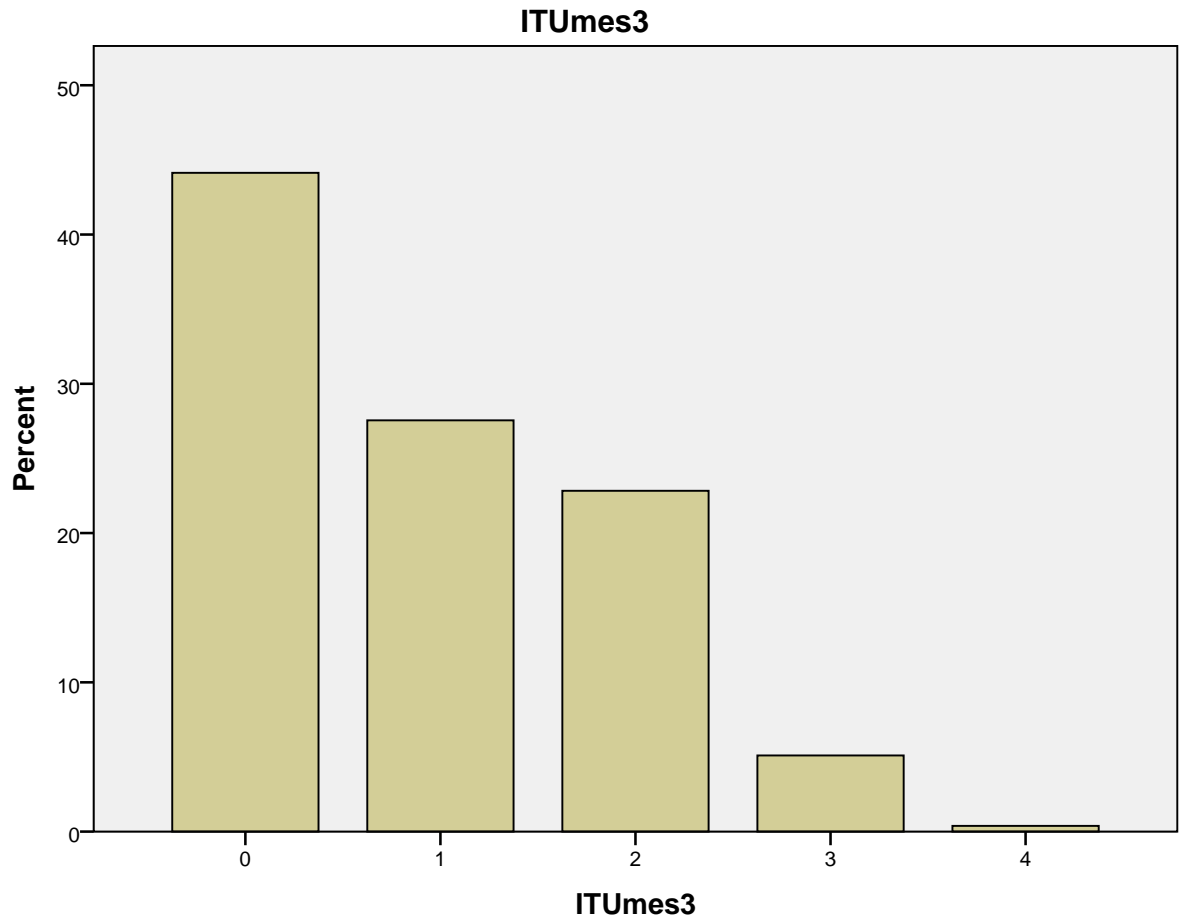

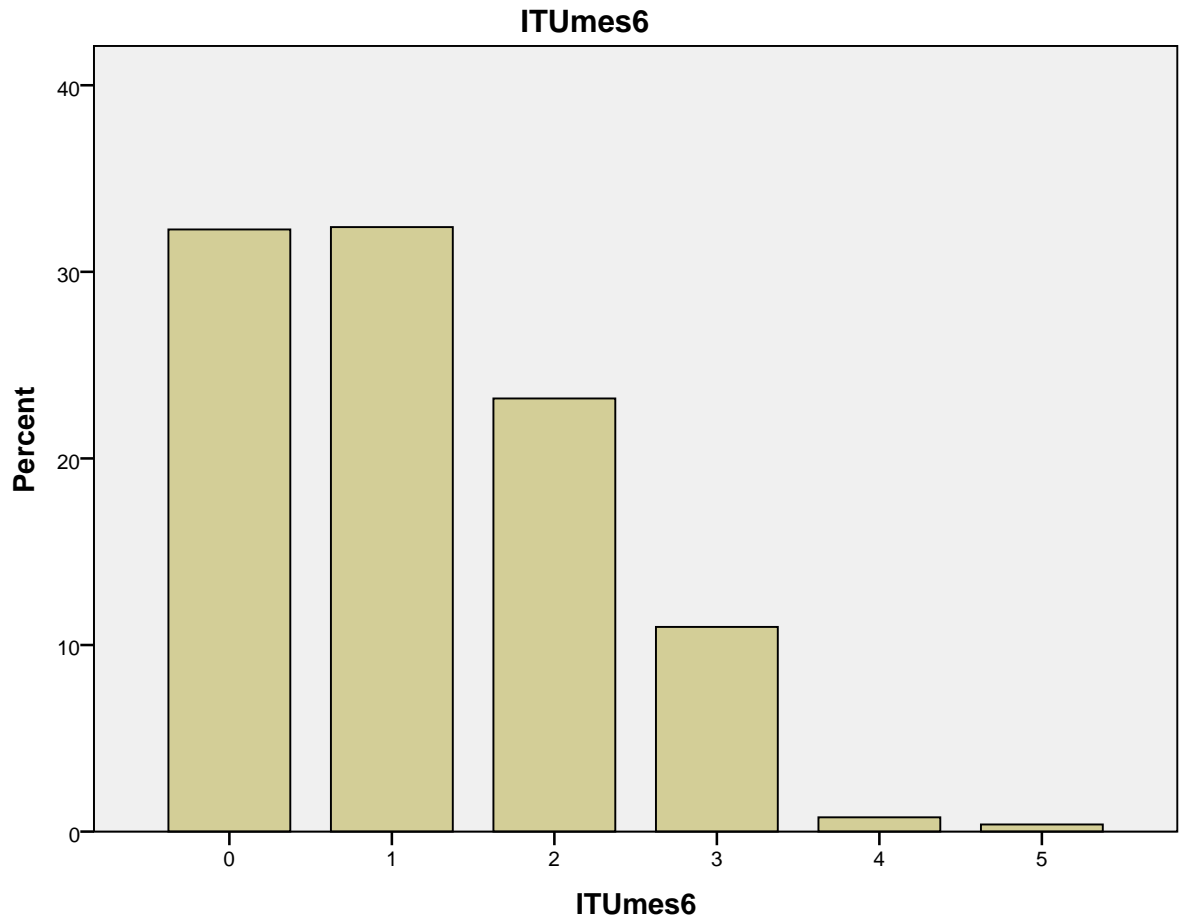

CROSSTABS

/TABLES=Sexo BY ITUmes0

/FORMAT=AVALUE TABLES

/STATISTICS=CHISQ

/CELLS=COUNT ROW

/COUNT ROUND CELL.

## Crosstabs

**Notes**

|                        |                                |                                                                                                                                 |
|------------------------|--------------------------------|---------------------------------------------------------------------------------------------------------------------------------|
| Output Created         |                                | 14-SEP-2019 23:15:31                                                                                                            |
| Input                  | Data                           | C:<br>\Users\mmm\Documents\CONGRESOS 2017 Treballs\EUROPEO LONDON 2017 VACUNAS UROMUNE\VACUNAS_Base Dades_BMC.sav               |
|                        | Active Dataset                 | DataSet2                                                                                                                        |
|                        | Filter                         | <none>                                                                                                                          |
|                        | Weight                         | <none>                                                                                                                          |
|                        | Split File                     | <none>                                                                                                                          |
|                        | N of Rows in Working Data File | 784                                                                                                                             |
| Missing Value Handling | Definition of Missing          | User-defined missing values are treated as missing.                                                                             |
|                        | Cases Used                     | Statistics for each table are based on all the cases with valid data in the specified range(s) for all variables in each table. |
| Syntax                 |                                | CROSSTABS<br>/TABLES=Sexo BY ITUmes0<br>/FORMAT=AVALUE TABLES<br>/STATISTICS=CHISQ<br>/CELLS=COUNT ROW<br>/COUNT ROUND CELL.    |
| Resources              | Processor Time                 | 00:00:00,13                                                                                                                     |
|                        | Elapsed Time                   | 00:00:00,07                                                                                                                     |
|                        | Dimensions Requested           | 2                                                                                                                               |
|                        | Cells Available                | 349496                                                                                                                          |

**Case Processing Summary**

|                | Cases |         |         |         |       |         |
|----------------|-------|---------|---------|---------|-------|---------|
|                | Valid |         | Missing |         | Total |         |
|                | N     | Percent | N       | Percent | N     | Percent |
| Sexo * ITUmes0 | 784   | 100,0%  | 0       | 0,0%    | 784   | 100,0%  |

**Sexo \* ITUmes0 Crosstabulation**

|       |        |               | ITUmes0 |       |       |      |      |      |
|-------|--------|---------------|---------|-------|-------|------|------|------|
|       |        |               | 3       | 4     | 5     | 6    | 7    | 8    |
| Sexo  | Mujer  | Count         | 241     | 182   | 126   | 62   | 25   | 10   |
|       |        | % within Sexo | 37,2%   | 28,1% | 19,4% | 9,6% | 3,9% | 1,5% |
|       | Hombre | Count         | 51      | 38    | 27    | 13   | 6    | 1    |
|       |        | % within Sexo | 37,5%   | 27,9% | 19,9% | 9,6% | 4,4% | 0,7% |
| Total |        | Count         | 292     | 220   | 153   | 75   | 31   | 11   |
|       |        | % within Sexo | 37,2%   | 28,1% | 19,5% | 9,6% | 4,0% | 1,4% |

**Sexo \* ITUmes0 Crosstabulation**

|       |        |               | ITUmes0 |      | Total  |
|-------|--------|---------------|---------|------|--------|
|       |        |               | 9       | 10   |        |
| Sexo  | Mujer  | Count         | 1       | 1    | 648    |
|       |        | % within Sexo | 0,2%    | 0,2% | 100,0% |
|       | Hombre | Count         | 0       | 0    | 136    |
|       |        | % within Sexo | 0,0%    | 0,0% | 100,0% |
| Total |        | Count         | 1       | 1    | 784    |
|       |        | % within Sexo | 0,1%    | 0,1% | 100,0% |

**Chi-Square Tests**

|                              | Value              | df | Asymptotic Significance (2-sided) |
|------------------------------|--------------------|----|-----------------------------------|
| Pearson Chi-Square           | 1,043 <sup>a</sup> | 7  | ,994                              |
| Likelihood Ratio             | 1,472              | 7  | ,983                              |
| Linear-by-Linear Association | ,073               | 1  | ,787                              |
| N of Valid Cases             | 784                |    |                                   |

a. 5 cells (31,3%) have expected count less than 5. The minimum expected count is ,17.

CROSSTABS

/TABLES=Sexo BY ITUmes3

/FORMAT=AVALUE TABLES

/STATISTICS=CHISQ

/CELLS=COUNT ROW

/COUNT ROUND CELL.

**Crosstabs**

**Notes**

|                        |                                |                                                                                                                                 |
|------------------------|--------------------------------|---------------------------------------------------------------------------------------------------------------------------------|
| Output Created         |                                | 14-SEP-2019 23:15:31                                                                                                            |
| Input                  | Data                           | C:<br>\Users\mmm\Documents\CONGRESOS 2017 Treballs\EUROPEO LONDON 2017 VACUNAS UROMUNE\VACUNAS_Base Dades_BMC.sav               |
|                        | Active Dataset                 | DataSet2                                                                                                                        |
|                        | Filter                         | <none>                                                                                                                          |
|                        | Weight                         | <none>                                                                                                                          |
|                        | Split File                     | <none>                                                                                                                          |
|                        | N of Rows in Working Data File | 784                                                                                                                             |
| Missing Value Handling | Definition of Missing          | User-defined missing values are treated as missing.                                                                             |
|                        | Cases Used                     | Statistics for each table are based on all the cases with valid data in the specified range(s) for all variables in each table. |
| Syntax                 |                                | CROSSTABS<br>/TABLES=Sexo BY ITUmes3<br>/FORMAT=AVALUE TABLES<br>/STATISTICS=CHISQ<br>/CELLS=COUNT ROW<br>/COUNT ROUND CELL.    |
| Resources              | Processor Time                 | 00:00:00,13                                                                                                                     |
|                        | Elapsed Time                   | 00:00:00,16                                                                                                                     |
|                        | Dimensions Requested           | 2                                                                                                                               |
|                        | Cells Available                | 349496                                                                                                                          |

**Case Processing Summary**

|                | Cases |         |         |         |       |         |
|----------------|-------|---------|---------|---------|-------|---------|
|                | Valid |         | Missing |         | Total |         |
|                | N     | Percent | N       | Percent | N     | Percent |
| Sexo * ITUmes3 | 784   | 100,0%  | 0       | 0,0%    | 784   | 100,0%  |

**Sexo \* ITUmes3 Crosstabulation**

|       |        |               | ITUmes3 |       |       |      |      | Total  |
|-------|--------|---------------|---------|-------|-------|------|------|--------|
|       |        |               | 0       | 1     | 2     | 3    | 4    |        |
| Sexo  | Mujer  | Count         | 294     | 185   | 138   | 28   | 3    | 648    |
|       |        | % within Sexo | 45,4%   | 28,5% | 21,3% | 4,3% | 0,5% | 100,0% |
|       | Hombre | Count         | 52      | 31    | 41    | 12   | 0    | 136    |
|       |        | % within Sexo | 38,2%   | 22,8% | 30,1% | 8,8% | 0,0% | 100,0% |
| Total |        | Count         | 346     | 216   | 179   | 40   | 3    | 784    |
|       |        | % within Sexo | 44,1%   | 27,6% | 22,8% | 5,1% | 0,4% | 100,0% |

### Chi-Square Tests

|                              | Value               | df | Asymptotic Significance (2-sided) |
|------------------------------|---------------------|----|-----------------------------------|
| Pearson Chi-Square           | 11,601 <sup>a</sup> | 4  | ,021                              |
| Likelihood Ratio             | 11,328              | 4  | ,023                              |
| Linear-by-Linear Association | 6,962               | 1  | ,008                              |
| N of Valid Cases             | 784                 |    |                                   |

a. 2 cells (20,0%) have expected count less than 5. The minimum expected count is ,52.

#### CROSSTABS

/TABLES=Sexo BY ITUmes6

/FORMAT=AVALUE TABLES

/STATISTICS=CHISQ

/CELLS=COUNT ROW

/COUNT ROUND CELL.

### Crosstabs

**Notes**

|                        |                                |                                                                                                                                 |
|------------------------|--------------------------------|---------------------------------------------------------------------------------------------------------------------------------|
| Output Created         |                                | 14-SEP-2019 23:15:31                                                                                                            |
| Input                  | Data                           | C:<br>\Users\mmm\Documents\CONGRESOS 2017 Treballs\EUROPEO LONDON 2017 VACUNAS UROMUNE\VACUNAS_Base Dades_BMC.sav               |
|                        | Active Dataset                 | DataSet2                                                                                                                        |
|                        | Filter                         | <none>                                                                                                                          |
|                        | Weight                         | <none>                                                                                                                          |
|                        | Split File                     | <none>                                                                                                                          |
|                        | N of Rows in Working Data File | 784                                                                                                                             |
| Missing Value Handling | Definition of Missing          | User-defined missing values are treated as missing.                                                                             |
|                        | Cases Used                     | Statistics for each table are based on all the cases with valid data in the specified range(s) for all variables in each table. |
| Syntax                 |                                | CROSSTABS<br>/TABLES=Sexo BY ITUmes6<br>/FORMAT=AVALUE TABLES<br>/STATISTICS=CHISQ<br>/CELLS=COUNT ROW<br>/COUNT ROUND CELL.    |
| Resources              | Processor Time                 | 00:00:00,05                                                                                                                     |
|                        | Elapsed Time                   | 00:00:00,12                                                                                                                     |
|                        | Dimensions Requested           | 2                                                                                                                               |
|                        | Cells Available                | 349496                                                                                                                          |

**Case Processing Summary**

|                | Cases |         |         |         |       |         |
|----------------|-------|---------|---------|---------|-------|---------|
|                | Valid |         | Missing |         | Total |         |
|                | N     | Percent | N       | Percent | N     | Percent |
| Sexo * ITUmes6 | 784   | 100,0%  | 0       | 0,0%    | 784   | 100,0%  |

**Sexo \* ITUmes6 Crosstabulation**

|       |        |               | ITUmes6 |       |       |       |      |      |
|-------|--------|---------------|---------|-------|-------|-------|------|------|
|       |        |               | 0       | 1     | 2     | 3     | 4    | 5    |
| Sexo  | Mujer  | Count         | 212     | 215   | 151   | 64    | 3    | 3    |
|       |        | % within Sexo | 32,7%   | 33,2% | 23,3% | 9,9%  | 0,5% | 0,5% |
|       | Hombre | Count         | 41      | 39    | 31    | 22    | 3    | 0    |
|       |        | % within Sexo | 30,1%   | 28,7% | 22,8% | 16,2% | 2,2% | 0,0% |
| Total |        | Count         | 253     | 254   | 182   | 86    | 6    | 3    |
|       |        | % within Sexo | 32,3%   | 32,4% | 23,2% | 11,0% | 0,8% | 0,4% |

**Sexo \* ITUmes6 Crosstabulation**

|       |               |               | Total  |
|-------|---------------|---------------|--------|
| Sexo  | Mujer         | Count         | 648    |
|       |               | % within Sexo | 100,0% |
|       | Hombre        | Count         | 136    |
|       |               | % within Sexo | 100,0% |
| Total | Count         | 784           |        |
|       | % within Sexo | 100,0%        |        |

**Chi-Square Tests**

|                              | Value               | df | Asymptotic Significance (2-sided) |
|------------------------------|---------------------|----|-----------------------------------|
| Pearson Chi-Square           | 10,104 <sup>a</sup> | 5  | ,072                              |
| Likelihood Ratio             | 9,110               | 5  | ,105                              |
| Linear-by-Linear Association | 3,333               | 1  | ,068                              |
| N of Valid Cases             | 784                 |    |                                   |

a. 4 cells (33,3%) have expected count less than 5. The minimum expected count is ,52.

```
DO IF (Sexo = 0).
RECODE EDAD (50 thru Highest=1) INTO menopausicas
END IF.
EXECUTE.
```

```
FREQUENCIES VARIABLES=menopausicas
/ORDER=ANALYSIS.
```

**Frequencies**



**Notes**

|                        |                                   |                                                                                                                                |
|------------------------|-----------------------------------|--------------------------------------------------------------------------------------------------------------------------------|
| Output Created         |                                   | 14-SEP-2019 23:15:31                                                                                                           |
| Input                  | Data                              | C:<br>\Users\mmm\Documents\CONGRESO<br>S 2017 Treballs\EUROPEO<br>LONDON 2017 VACUNAS<br>UROMUNE\VACUNAS_Base<br>Dades_BMC.sav |
|                        | Active Dataset                    | DataSet2                                                                                                                       |
|                        | Filter                            | <none>                                                                                                                         |
|                        | Weight                            | <none>                                                                                                                         |
|                        | Split File                        | <none>                                                                                                                         |
|                        | N of Rows in Working Data<br>File | 784                                                                                                                            |
| Missing Value Handling | Definition of Missing             | User-defined missing values are<br>treated as missing.                                                                         |
|                        | Cases Used                        | Statistics are based on all cases with<br>valid data.                                                                          |
| Syntax                 |                                   | FREQUENCIES<br>VARIABLES=menopausicas<br>/ORDER=ANALYSIS.                                                                      |
| Resources              | Processor Time                    | 00:00:00,02                                                                                                                    |
|                        | Elapsed Time                      | 00:00:00,03                                                                                                                    |

**Statistics**

menopausicas

|   |         |     |
|---|---------|-----|
| N | Valid   | 613 |
|   | Missing | 171 |

**menopausicas**

|         |        | Frequency | Percent | Valid Percent | Cumulative<br>Percent |
|---------|--------|-----------|---------|---------------|-----------------------|
| Valid   | 1,00   | 613       | 78,2    | 100,0         | 100,0                 |
| Missing | System | 171       | 21,8    |               |                       |
| Total   |        | 784       | 100,0   |               |                       |

CROSSTABS

```

/TABLES=menopausicas BY ITUmes0
/FORMAT=AVALUE TABLES
/STATISTICS=CHISQ
/CELLS=COUNT ROW COLUMN TOTAL
/COUNT ROUND CELL.
    
```

**Crosstabs**

**Notes**

|                        |                                   |                                                                                                                                                         |
|------------------------|-----------------------------------|---------------------------------------------------------------------------------------------------------------------------------------------------------|
| Output Created         |                                   | 14-SEP-2019 23:15:31                                                                                                                                    |
| Input                  | Data                              | C:<br>\Users\mmm\Documents\CONGRESO<br>S 2017 Treballs\EUROPEO<br>LONDON 2017 VACUNAS<br>UROMUNE\VACUNAS_Base<br>Dades_BMC.sav                          |
|                        | Active Dataset                    | DataSet2                                                                                                                                                |
|                        | Filter                            | <none>                                                                                                                                                  |
|                        | Weight                            | <none>                                                                                                                                                  |
|                        | Split File                        | <none>                                                                                                                                                  |
|                        | N of Rows in Working Data<br>File | 784                                                                                                                                                     |
| Missing Value Handling | Definition of Missing             | User-defined missing values are<br>treated as missing.                                                                                                  |
|                        | Cases Used                        | Statistics for each table are based<br>on all the cases with valid data in the<br>specified range(s) for all variables in<br>each table.                |
| Syntax                 |                                   | CROSSTABS<br>/TABLES=menopausicas BY<br>ITUmes0<br>/FORMAT=AVALUE TABLES<br>/STATISTICS=CHISQ<br>/CELLS=COUNT ROW COLUMN<br>TOTAL<br>/COUNT ROUND CELL. |
| Resources              | Processor Time                    | 00:00:00,05                                                                                                                                             |
|                        | Elapsed Time                      | 00:00:00,04                                                                                                                                             |
|                        | Dimensions Requested              | 2                                                                                                                                                       |
|                        | Cells Available                   | 349496                                                                                                                                                  |

**Case Processing Summary**

|                        | Cases |         |         |         |       |         |
|------------------------|-------|---------|---------|---------|-------|---------|
|                        | Valid |         | Missing |         | Total |         |
|                        | N     | Percent | N       | Percent | N     | Percent |
| menopausicas * ITUmes0 | 613   | 78,2%   | 171     | 21,8%   | 784   | 100,0%  |

**menopausicas \* ITUmes0 Crosstabulation**

|              |      |                       | ITUmes0 |        |        |        |
|--------------|------|-----------------------|---------|--------|--------|--------|
|              |      |                       | 3       | 4      | 5      | 6      |
| menopausicas | 1,00 | Count                 | 225     | 173    | 120    | 59     |
|              |      | % within menopausicas | 36,7%   | 28,2%  | 19,6%  | 9,6%   |
|              |      | % within ITUmes0      | 100,0%  | 100,0% | 100,0% | 100,0% |
|              |      | % of Total            | 36,7%   | 28,2%  | 19,6%  | 9,6%   |
| Total        |      | Count                 | 225     | 173    | 120    | 59     |
|              |      | % within menopausicas | 36,7%   | 28,2%  | 19,6%  | 9,6%   |
|              |      | % within ITUmes0      | 100,0%  | 100,0% | 100,0% | 100,0% |
|              |      | % of Total            | 36,7%   | 28,2%  | 19,6%  | 9,6%   |

**menopausicas \* ITUmes0 Crosstabulation**

|              |      |                       | ITUmes0 |        |        |        |
|--------------|------|-----------------------|---------|--------|--------|--------|
|              |      |                       | 7       | 8      | 9      | 10     |
| menopausicas | 1,00 | Count                 | 24      | 10     | 1      | 1      |
|              |      | % within menopausicas | 3,9%    | 1,6%   | 0,2%   | 0,2%   |
|              |      | % within ITUmes0      | 100,0%  | 100,0% | 100,0% | 100,0% |
|              |      | % of Total            | 3,9%    | 1,6%   | 0,2%   | 0,2%   |
| Total        |      | Count                 | 24      | 10     | 1      | 1      |
|              |      | % within menopausicas | 3,9%    | 1,6%   | 0,2%   | 0,2%   |
|              |      | % within ITUmes0      | 100,0%  | 100,0% | 100,0% | 100,0% |
|              |      | % of Total            | 3,9%    | 1,6%   | 0,2%   | 0,2%   |

**menopausicas \* ITUmes0 Crosstabulation**

|              |      |                       | Total  |
|--------------|------|-----------------------|--------|
| menopausicas | 1,00 | Count                 | 613    |
|              |      | % within menopausicas | 100,0% |
|              |      | % within ITUmes0      | 100,0% |
|              |      | % of Total            | 100,0% |
| Total        |      | Count                 | 613    |
|              |      | % within menopausicas | 100,0% |
|              |      | % within ITUmes0      | 100,0% |
|              |      | % of Total            | 100,0% |

**Chi-Square Tests**

|                    | Value          |
|--------------------|----------------|
| Pearson Chi-Square | . <sup>a</sup> |
| N of Valid Cases   | 613            |

a. No statistics are computed because menopausicas is a constant.

```

CROSSTABS
  /TABLES=menopausicas BY ITUmes3
  /FORMAT=AVALUE TABLES
  /STATISTICS=CHISQ
  /CELLS=COUNT ROW COLUMN TOTAL

```

## Crosstabs

### Notes

|                        |                                   |                                                                                                                                                         |
|------------------------|-----------------------------------|---------------------------------------------------------------------------------------------------------------------------------------------------------|
| Output Created         |                                   | 14-SEP-2019 23:15:31                                                                                                                                    |
| Input                  | Data                              | C:<br>\Users\mm\Documents\CONGRESO<br>S 2017 Treballs\EUROPEO<br>LONDON 2017 VACUNAS<br>UROMUNE\VACUNAS_Base<br>Dades_BMC.sav                           |
|                        | Active Dataset                    | DataSet2                                                                                                                                                |
|                        | Filter                            | <none>                                                                                                                                                  |
|                        | Weight                            | <none>                                                                                                                                                  |
|                        | Split File                        | <none>                                                                                                                                                  |
|                        | N of Rows in Working Data<br>File | 784                                                                                                                                                     |
| Missing Value Handling | Definition of Missing             | User-defined missing values are<br>treated as missing.                                                                                                  |
|                        | Cases Used                        | Statistics for each table are based<br>on all the cases with valid data in the<br>specified range(s) for all variables in<br>each table.                |
| Syntax                 |                                   | CROSSTABS<br>/TABLES=menopausicas BY<br>ITUmes3<br>/FORMAT=AVALUE TABLES<br>/STATISTICS=CHISQ<br>/CELLS=COUNT ROW COLUMN<br>TOTAL<br>/COUNT ROUND CELL. |
| Resources              | Processor Time                    | 00:00:00,05                                                                                                                                             |
|                        | Elapsed Time                      | 00:00:00,05                                                                                                                                             |
|                        | Dimensions Requested              | 2                                                                                                                                                       |
|                        | Cells Available                   | 349496                                                                                                                                                  |

**Case Processing Summary**

|                        | Cases |         |         |         |       |         |
|------------------------|-------|---------|---------|---------|-------|---------|
|                        | Valid |         | Missing |         | Total |         |
|                        | N     | Percent | N       | Percent | N     | Percent |
| menopausicas * ITUmes3 | 613   | 78,2%   | 171     | 21,8%   | 784   | 100,0%  |

**menopausicas \* ITUmes3 Crosstabulation**

|              |      |                       | ITUmes3 |        |        |        |
|--------------|------|-----------------------|---------|--------|--------|--------|
|              |      |                       | 0       | 1      | 2      | 3      |
| menopausicas | 1,00 | Count                 | 286     | 171    | 127    | 26     |
|              |      | % within menopausicas | 46,7%   | 27,9%  | 20,7%  | 4,2%   |
|              |      | % within ITUmes3      | 100,0%  | 100,0% | 100,0% | 100,0% |
|              |      | % of Total            | 46,7%   | 27,9%  | 20,7%  | 4,2%   |
| Total        |      | Count                 | 286     | 171    | 127    | 26     |
|              |      | % within menopausicas | 46,7%   | 27,9%  | 20,7%  | 4,2%   |
|              |      | % within ITUmes3      | 100,0%  | 100,0% | 100,0% | 100,0% |
|              |      | % of Total            | 46,7%   | 27,9%  | 20,7%  | 4,2%   |

**menopausicas \* ITUmes3 Crosstabulation**

|              |      |                       | ITUmes3 | Total  |
|--------------|------|-----------------------|---------|--------|
|              |      |                       | 4       |        |
| menopausicas | 1,00 | Count                 | 3       | 613    |
|              |      | % within menopausicas | 0,5%    | 100,0% |
|              |      | % within ITUmes3      | 100,0%  | 100,0% |
|              |      | % of Total            | 0,5%    | 100,0% |
| Total        |      | Count                 | 3       | 613    |
|              |      | % within menopausicas | 0,5%    | 100,0% |
|              |      | % within ITUmes3      | 100,0%  | 100,0% |
|              |      | % of Total            | 0,5%    | 100,0% |

**Chi-Square Tests**

|                    | Value          |
|--------------------|----------------|
| Pearson Chi-Square | . <sup>a</sup> |
| N of Valid Cases   | 613            |

a. No statistics are computed because menopausicas is a constant.

CROSSTABS

/TABLES=menopausicas BY ITUmes6

```

/FORMAT=AVALUE TABLES
/STATISTICS=CHISQ
/CELLS=COUNT ROW COLUMN TOTAL
/COUNT ROUND CELL.

```

## Crosstabs

### Notes

|                        |                                |                                                                                                                                                         |
|------------------------|--------------------------------|---------------------------------------------------------------------------------------------------------------------------------------------------------|
| Output Created         |                                | 14-SEP-2019 23:15:31                                                                                                                                    |
| Input                  | Data                           | C:<br>\Users\mmm\Documents\CONGRESO<br>S 2017 Treballs\EUROPEO<br>LONDON 2017 VACUNAS<br>UROMUNE\VACUNAS_Base<br>Dades_BMC.sav                          |
|                        | Active Dataset                 | DataSet2                                                                                                                                                |
|                        | Filter                         | <none>                                                                                                                                                  |
|                        | Weight                         | <none>                                                                                                                                                  |
|                        | Split File                     | <none>                                                                                                                                                  |
|                        | N of Rows in Working Data File | 784                                                                                                                                                     |
| Missing Value Handling | Definition of Missing          | User-defined missing values are treated as missing.                                                                                                     |
|                        | Cases Used                     | Statistics for each table are based on all the cases with valid data in the specified range(s) for all variables in each table.                         |
| Syntax                 |                                | CROSSTABS<br>/TABLES=menopausicas BY<br>ITUmes6<br>/FORMAT=AVALUE TABLES<br>/STATISTICS=CHISQ<br>/CELLS=COUNT ROW COLUMN<br>TOTAL<br>/COUNT ROUND CELL. |
| Resources              | Processor Time                 | 00:00:00,08                                                                                                                                             |
|                        | Elapsed Time                   | 00:00:00,09                                                                                                                                             |
|                        | Dimensions Requested           | 2                                                                                                                                                       |
|                        | Cells Available                | 349496                                                                                                                                                  |

### Case Processing Summary

|                        | Cases |         |         |         |       |         |
|------------------------|-------|---------|---------|---------|-------|---------|
|                        | Valid |         | Missing |         | Total |         |
|                        | N     | Percent | N       | Percent | N     | Percent |
| menopausicas * ITUmes6 | 613   | 78,2%   | 171     | 21,8%   | 784   | 100,0%  |

**menopausicas \* ITUmes6 Crosstabulation**

|              |      |                       | ITUmes6 |        |        |        |
|--------------|------|-----------------------|---------|--------|--------|--------|
|              |      |                       | 0       | 1      | 2      | 3      |
| menopausicas | 1,00 | Count                 | 207     | 201    | 141    | 60     |
|              |      | % within menopausicas | 33,8%   | 32,8%  | 23,0%  | 9,8%   |
|              |      | % within ITUmes6      | 100,0%  | 100,0% | 100,0% | 100,0% |
|              |      | % of Total            | 33,8%   | 32,8%  | 23,0%  | 9,8%   |
| Total        |      | Count                 | 207     | 201    | 141    | 60     |
|              |      | % within menopausicas | 33,8%   | 32,8%  | 23,0%  | 9,8%   |
|              |      | % within ITUmes6      | 100,0%  | 100,0% | 100,0% | 100,0% |
|              |      | % of Total            | 33,8%   | 32,8%  | 23,0%  | 9,8%   |

**menopausicas \* ITUmes6 Crosstabulation**

|              |      |                       | ITUmes6 |        | Total  |
|--------------|------|-----------------------|---------|--------|--------|
|              |      |                       | 4       | 5      |        |
| menopausicas | 1,00 | Count                 | 1       | 3      | 613    |
|              |      | % within menopausicas | 0,2%    | 0,5%   | 100,0% |
|              |      | % within ITUmes6      | 100,0%  | 100,0% | 100,0% |
|              |      | % of Total            | 0,2%    | 0,5%   | 100,0% |
| Total        |      | Count                 | 1       | 3      | 613    |
|              |      | % within menopausicas | 0,2%    | 0,5%   | 100,0% |
|              |      | % within ITUmes6      | 100,0%  | 100,0% | 100,0% |
|              |      | % of Total            | 0,2%    | 0,5%   | 100,0% |

**Chi-Square Tests**

|                    | Value          |
|--------------------|----------------|
| Pearson Chi-Square | . <sup>a</sup> |
| N of Valid Cases   | 613            |

a. No statistics are computed because menopausicas is a constant.

```
DO IF (Sexo = 0).
RECODE EDAD (0 thru 50=1) INTO Nomenopausicas
END IF.
EXECUTE.
```

```
FREQUENCIES VARIABLES=Nomenopausicas
/ORDER=ANALYSIS.
```

**Frequencies**

**Notes**

|                        |                                |                                                                                                                   |
|------------------------|--------------------------------|-------------------------------------------------------------------------------------------------------------------|
| Output Created         |                                | 14-SEP-2019 23:15:32                                                                                              |
| Input                  | Data                           | C:<br>\Users\mmm\Documents\CONGRESOS 2017 Treballs\EUROPEO LONDON 2017 VACUNAS UROMUNE\VACUNAS_Base Dades_BMC.sav |
|                        | Active Dataset                 | DataSet2                                                                                                          |
|                        | Filter                         | <none>                                                                                                            |
|                        | Weight                         | <none>                                                                                                            |
|                        | Split File                     | <none>                                                                                                            |
|                        | N of Rows in Working Data File | 784                                                                                                               |
| Missing Value Handling | Definition of Missing          | User-defined missing values are treated as missing.                                                               |
|                        | Cases Used                     | Statistics are based on all cases with valid data.                                                                |
| Syntax                 |                                | FREQUENCIES<br>VARIABLES=NOmenopausicas<br>/ORDER=ANALYSIS.                                                       |
| Resources              | Processor Time                 | 00:00:00,02                                                                                                       |
|                        | Elapsed Time                   | 00:00:00,01                                                                                                       |

**Statistics**

NOmenopausicas

|   |         |     |
|---|---------|-----|
| N | Valid   | 648 |
|   | Missing | 136 |

**NOmenopausicas**

|         |        | Frequency | Percent | Valid Percent | Cumulative Percent |
|---------|--------|-----------|---------|---------------|--------------------|
| Valid   | ,00    | 600       | 76,5    | 92,6          | 92,6               |
|         | 1,00   | 48        | 6,1     | 7,4           | 100,0              |
|         | Total  | 648       | 82,7    | 100,0         |                    |
| Missing | System | 136       | 17,3    |               |                    |
| Total   |        | 784       | 100,0   |               |                    |

```
DO IF (Sexo = 0).
RECODE EDAD (0 thru 50=1) (50 thru Highest=0) INTO NOmenopausicas
END IF.
EXECUTE.
```

CROSSTABS



```

/TABLES=NOmenopausicas BY ITUmes0
/FORMAT=AVALUE TABLES
/STATISTICS=CHISQ
/CELLS=COUNT ROW COLUMN TOTAL
/COUNT ROUND CELL.

```

## Crosstabs

### Notes

|                        |                                |                                                                                                                                                           |
|------------------------|--------------------------------|-----------------------------------------------------------------------------------------------------------------------------------------------------------|
| Output Created         |                                | 14-SEP-2019 23:15:32                                                                                                                                      |
| Input                  | Data                           | C:<br>\Users\mm\Documents\CONGRESO<br>S 2017 Treballs\EUROPEO<br>LONDON 2017 VACUNAS<br>UROMUNE\VACUNAS_Base<br>Dades_BMC.sav                             |
|                        | Active Dataset                 | DataSet2                                                                                                                                                  |
|                        | Filter                         | <none>                                                                                                                                                    |
|                        | Weight                         | <none>                                                                                                                                                    |
|                        | Split File                     | <none>                                                                                                                                                    |
|                        | N of Rows in Working Data File | 784                                                                                                                                                       |
| Missing Value Handling | Definition of Missing          | User-defined missing values are treated as missing.                                                                                                       |
|                        | Cases Used                     | Statistics for each table are based on all the cases with valid data in the specified range(s) for all variables in each table.                           |
| Syntax                 |                                | CROSSTABS<br>/TABLES=NOmenopausicas BY<br>ITUmes0<br>/FORMAT=AVALUE TABLES<br>/STATISTICS=CHISQ<br>/CELLS=COUNT ROW COLUMN<br>TOTAL<br>/COUNT ROUND CELL. |
| Resources              | Processor Time                 | 00:00:00,03                                                                                                                                               |
|                        | Elapsed Time                   | 00:00:00,03                                                                                                                                               |
|                        | Dimensions Requested           | 2                                                                                                                                                         |
|                        | Cells Available                | 349496                                                                                                                                                    |

### Case Processing Summary

|                             | Cases |         |         |         |       |         |
|-----------------------------|-------|---------|---------|---------|-------|---------|
|                             | Valid |         | Missing |         | Total |         |
|                             | N     | Percent | N       | Percent | N     | Percent |
| NOmenopausicas *<br>ITUmes0 | 648   | 82,7%   | 136     | 17,3%   | 784   | 100,0%  |

**NOmenopausicas \* ITUmes0 Crosstabulation**

|                |      |                         | ITUmes0 |        |        |        |
|----------------|------|-------------------------|---------|--------|--------|--------|
|                |      |                         | 3       | 4      | 5      | 6      |
| NOmenopausicas | ,00  | Count                   | 224     | 172    | 120    | 59     |
|                |      | % within NOmenopausicas | 36,7%   | 28,2%  | 19,6%  | 9,7%   |
|                |      | % within ITUmes0        | 92,9%   | 94,5%  | 95,2%  | 95,2%  |
|                |      | % of Total              | 34,6%   | 26,5%  | 18,5%  | 9,1%   |
|                | 1,00 | Count                   | 17      | 10     | 6      | 3      |
|                |      | % within NOmenopausicas | 45,9%   | 27,0%  | 16,2%  | 8,1%   |
|                |      | % within ITUmes0        | 7,1%    | 5,5%   | 4,8%   | 4,8%   |
|                |      | % of Total              | 2,6%    | 1,5%   | 0,9%   | 0,5%   |
| Total          |      | Count                   | 241     | 182    | 126    | 62     |
|                |      | % within NOmenopausicas | 37,2%   | 28,1%  | 19,4%  | 9,6%   |
|                |      | % within ITUmes0        | 100,0%  | 100,0% | 100,0% | 100,0% |
|                |      | % of Total              | 37,2%   | 28,1%  | 19,4%  | 9,6%   |

**NOmenopausicas \* ITUmes0 Crosstabulation**

|                |      |                         | ITUmes0 |        |        |        |
|----------------|------|-------------------------|---------|--------|--------|--------|
|                |      |                         | 7       | 8      | 9      | 10     |
| NOmenopausicas | ,00  | Count                   | 24      | 10     | 1      | 1      |
|                |      | % within NOmenopausicas | 3,9%    | 1,6%   | 0,2%   | 0,2%   |
|                |      | % within ITUmes0        | 96,0%   | 100,0% | 100,0% | 100,0% |
|                |      | % of Total              | 3,7%    | 1,5%   | 0,2%   | 0,2%   |
|                | 1,00 | Count                   | 1       | 0      | 0      | 0      |
|                |      | % within NOmenopausicas | 2,7%    | 0,0%   | 0,0%   | 0,0%   |
|                |      | % within ITUmes0        | 4,0%    | 0,0%   | 0,0%   | 0,0%   |
|                |      | % of Total              | 0,2%    | 0,0%   | 0,0%   | 0,0%   |
| Total          |      | Count                   | 25      | 10     | 1      | 1      |
|                |      | % within NOmenopausicas | 3,9%    | 1,5%   | 0,2%   | 0,2%   |
|                |      | % within ITUmes0        | 100,0%  | 100,0% | 100,0% | 100,0% |
|                |      | % of Total              | 3,9%    | 1,5%   | 0,2%   | 0,2%   |

**NOmenopausicas \* ITUmes0 Crosstabulation**

|                |      |                         | Total  |
|----------------|------|-------------------------|--------|
| NOmenopausicas | ,00  | Count                   | 611    |
|                |      | % within NOmenopausicas | 100,0% |
|                |      | % within ITUmes0        | 94,3%  |
|                |      | % of Total              | 94,3%  |
|                | 1,00 | Count                   | 37     |
|                |      | % within NOmenopausicas | 100,0% |
|                |      | % within ITUmes0        | 5,7%   |
|                |      | % of Total              | 5,7%   |
| Total          |      | Count                   | 648    |
|                |      | % within NOmenopausicas | 100,0% |
|                |      | % within ITUmes0        | 100,0% |
|                |      | % of Total              | 100,0% |

**Chi-Square Tests**

|                              | Value              | df | Asymptotic Significance (2-sided) |
|------------------------------|--------------------|----|-----------------------------------|
| Pearson Chi-Square           | 1,984 <sup>a</sup> | 7  | ,961                              |
| Likelihood Ratio             | 2,647              | 7  | ,916                              |
| Linear-by-Linear Association | 1,692              | 1  | ,193                              |
| N of Valid Cases             | 648                |    |                                   |

a. 7 cells (43,8%) have expected count less than 5. The minimum expected count is ,06.

CROSSTABS

/TABLES=NOmenopausicas BY ITUmes3

/FORMAT=AVALUE TABLES

/STATISTICS=CHISQ

/CELLS=COUNT ROW COLUMN TOTAL

/COUNT ROUND CELL.

**Crosstabs**

**Notes**

|                        |                                |                                                                                                                                                           |
|------------------------|--------------------------------|-----------------------------------------------------------------------------------------------------------------------------------------------------------|
| Output Created         |                                | 14-SEP-2019 23:15:32                                                                                                                                      |
| Input                  | Data                           | C:<br>\Users\mmm\Documents\CONGRESO<br>S 2017 Treballs\EUROPEO<br>LONDON 2017 VACUNAS<br>UROMUNE\VACUNAS_Base<br>Dades_BMC.sav                            |
|                        | Active Dataset                 | DataSet2                                                                                                                                                  |
|                        | Filter                         | <none>                                                                                                                                                    |
|                        | Weight                         | <none>                                                                                                                                                    |
|                        | Split File                     | <none>                                                                                                                                                    |
|                        | N of Rows in Working Data File | 784                                                                                                                                                       |
| Missing Value Handling | Definition of Missing          | User-defined missing values are treated as missing.                                                                                                       |
|                        | Cases Used                     | Statistics for each table are based on all the cases with valid data in the specified range(s) for all variables in each table.                           |
| Syntax                 |                                | CROSSTABS<br>/TABLES=NOmenopausicas BY<br>ITUmes3<br>/FORMAT=AVALUE TABLES<br>/STATISTICS=CHISQ<br>/CELLS=COUNT ROW COLUMN<br>TOTAL<br>/COUNT ROUND CELL. |
| Resources              | Processor Time                 | 00:00:00,03                                                                                                                                               |
|                        | Elapsed Time                   | 00:00:00,04                                                                                                                                               |
|                        | Dimensions Requested           | 2                                                                                                                                                         |
|                        | Cells Available                | 349496                                                                                                                                                    |

**Case Processing Summary**

|                             | Cases |         |         |         |       |         |
|-----------------------------|-------|---------|---------|---------|-------|---------|
|                             | Valid |         | Missing |         | Total |         |
|                             | N     | Percent | N       | Percent | N     | Percent |
| NOmenopausicas *<br>ITUmes3 | 648   | 82,7%   | 136     | 17,3%   | 784   | 100,0%  |

**NOmenopausicas \* ITUmes3 Crosstabulation**

|                |      |                         | ITUmes3 |        |        |        |
|----------------|------|-------------------------|---------|--------|--------|--------|
|                |      |                         | 0       | 1      | 2      | 3      |
| NOmenopausicas | ,00  | Count                   | 284     | 171    | 127    | 26     |
|                |      | % within NOmenopausicas | 46,5%   | 28,0%  | 20,8%  | 4,3%   |
|                |      | % within ITUmes3        | 96,6%   | 92,4%  | 92,0%  | 92,9%  |
|                |      | % of Total              | 43,8%   | 26,4%  | 19,6%  | 4,0%   |
|                | 1,00 | Count                   | 10      | 14     | 11     | 2      |
|                |      | % within NOmenopausicas | 27,0%   | 37,8%  | 29,7%  | 5,4%   |
|                |      | % within ITUmes3        | 3,4%    | 7,6%   | 8,0%   | 7,1%   |
|                |      | % of Total              | 1,5%    | 2,2%   | 1,7%   | 0,3%   |
| Total          |      | Count                   | 294     | 185    | 138    | 28     |
|                |      | % within NOmenopausicas | 45,4%   | 28,5%  | 21,3%  | 4,3%   |
|                |      | % within ITUmes3        | 100,0%  | 100,0% | 100,0% | 100,0% |
|                |      | % of Total              | 45,4%   | 28,5%  | 21,3%  | 4,3%   |

**NOmenopausicas \* ITUmes3 Crosstabulation**

|                |      |                         | ITUmes3 | Total  |
|----------------|------|-------------------------|---------|--------|
|                |      |                         | 4       |        |
| NOmenopausicas | ,00  | Count                   | 3       | 611    |
|                |      | % within NOmenopausicas | 0,5%    | 100,0% |
|                |      | % within ITUmes3        | 100,0%  | 94,3%  |
|                |      | % of Total              | 0,5%    | 94,3%  |
|                | 1,00 | Count                   | 0       | 37     |
|                |      | % within NOmenopausicas | 0,0%    | 100,0% |
|                |      | % within ITUmes3        | 0,0%    | 5,7%   |
|                |      | % of Total              | 0,0%    | 5,7%   |
| Total          |      | Count                   | 3       | 648    |
|                |      | % within NOmenopausicas | 0,5%    | 100,0% |
|                |      | % within ITUmes3        | 100,0%  | 100,0% |
|                |      | % of Total              | 0,5%    | 100,0% |

### Chi-Square Tests

|                              | Value              | df | Asymptotic Significance (2-sided) |
|------------------------------|--------------------|----|-----------------------------------|
| Pearson Chi-Square           | 5,695 <sup>a</sup> | 4  | ,223                              |
| Likelihood Ratio             | 6,086              | 4  | ,193                              |
| Linear-by-Linear Association | 3,454              | 1  | ,063                              |
| N of Valid Cases             | 648                |    |                                   |

a. 3 cells (30,0%) have expected count less than 5. The minimum expected count is ,17.

#### CROSSTABS

```
/TABLES=Nomenopausicas BY ITUmes6  
/FORMAT=AVALUE TABLES  
/STATISTICS=CHISQ  
/CELLS=COUNT ROW COLUMN TOTAL  
/COUNT ROUND CELL.
```

### Crosstabs

**Notes**

|                        |                                   |                                                                                                                                                           |
|------------------------|-----------------------------------|-----------------------------------------------------------------------------------------------------------------------------------------------------------|
| Output Created         |                                   | 14-SEP-2019 23:15:32                                                                                                                                      |
| Input                  | Data                              | C:<br>\Users\mmm\Documents\CONGRESO<br>S 2017 Treballs\EUROPEO<br>LONDON 2017 VACUNAS<br>UROMUNE\VACUNAS_Base<br>Dades_BMC.sav                            |
|                        | Active Dataset                    | DataSet2                                                                                                                                                  |
|                        | Filter                            | <none>                                                                                                                                                    |
|                        | Weight                            | <none>                                                                                                                                                    |
|                        | Split File                        | <none>                                                                                                                                                    |
|                        | N of Rows in Working Data<br>File | 784                                                                                                                                                       |
| Missing Value Handling | Definition of Missing             | User-defined missing values are<br>treated as missing.                                                                                                    |
|                        | Cases Used                        | Statistics for each table are based<br>on all the cases with valid data in the<br>specified range(s) for all variables in<br>each table.                  |
| Syntax                 |                                   | CROSSTABS<br>/TABLES=NOmenopausicas BY<br>ITUmes6<br>/FORMAT=AVALUE TABLES<br>/STATISTICS=CHISQ<br>/CELLS=COUNT ROW COLUMN<br>TOTAL<br>/COUNT ROUND CELL. |
| Resources              | Processor Time                    | 00:00:00,02                                                                                                                                               |
|                        | Elapsed Time                      | 00:00:00,03                                                                                                                                               |
|                        | Dimensions Requested              | 2                                                                                                                                                         |
|                        | Cells Available                   | 349496                                                                                                                                                    |

**Case Processing Summary**

|                             | Cases |         |         |         |       |         |
|-----------------------------|-------|---------|---------|---------|-------|---------|
|                             | Valid |         | Missing |         | Total |         |
|                             | N     | Percent | N       | Percent | N     | Percent |
| NOmenopausicas *<br>ITUmes6 | 648   | 82,7%   | 136     | 17,3%   | 784   | 100,0%  |

**NOmenopausicas \* ITUmes6 Crosstabulation**

|                |      |                         | ITUmes6 |        |        |        |
|----------------|------|-------------------------|---------|--------|--------|--------|
|                |      |                         | 0       | 1      | 2      | 3      |
| NOmenopausicas | ,00  | Count                   | 205     | 201    | 141    | 60     |
|                |      | % within NOmenopausicas | 33,6%   | 32,9%  | 23,1%  | 9,8%   |
|                |      | % within ITUmes6        | 96,7%   | 93,5%  | 93,4%  | 93,8%  |
|                |      | % of Total              | 31,6%   | 31,0%  | 21,8%  | 9,3%   |
|                | 1,00 | Count                   | 7       | 14     | 10     | 4      |
|                |      | % within NOmenopausicas | 18,9%   | 37,8%  | 27,0%  | 10,8%  |
|                |      | % within ITUmes6        | 3,3%    | 6,5%   | 6,6%   | 6,3%   |
|                |      | % of Total              | 1,1%    | 2,2%   | 1,5%   | 0,6%   |
| Total          |      | Count                   | 212     | 215    | 151    | 64     |
|                |      | % within NOmenopausicas | 32,7%   | 33,2%  | 23,3%  | 9,9%   |
|                |      | % within ITUmes6        | 100,0%  | 100,0% | 100,0% | 100,0% |
|                |      | % of Total              | 32,7%   | 33,2%  | 23,3%  | 9,9%   |

**NOmenopausicas \* ITUmes6 Crosstabulation**

|                |      |                         | ITUmes6 |        | Total  |
|----------------|------|-------------------------|---------|--------|--------|
|                |      |                         | 4       | 5      |        |
| NOmenopausicas | ,00  | Count                   | 1       | 3      | 611    |
|                |      | % within NOmenopausicas | 0,2%    | 0,5%   | 100,0% |
|                |      | % within ITUmes6        | 33,3%   | 100,0% | 94,3%  |
|                |      | % of Total              | 0,2%    | 0,5%   | 94,3%  |
|                | 1,00 | Count                   | 2       | 0      | 37     |
|                |      | % within NOmenopausicas | 5,4%    | 0,0%   | 100,0% |
|                |      | % within ITUmes6        | 66,7%   | 0,0%   | 5,7%   |
|                |      | % of Total              | 0,3%    | 0,0%   | 5,7%   |
| Total          |      | Count                   | 3       | 3      | 648    |
|                |      | % within NOmenopausicas | 0,5%    | 0,5%   | 100,0% |
|                |      | % within ITUmes6        | 100,0%  | 100,0% | 100,0% |
|                |      | % of Total              | 0,5%    | 0,5%   | 100,0% |



### Chi-Square Tests

|                              | Value               | df | Asymptotic Significance (2-sided) |
|------------------------------|---------------------|----|-----------------------------------|
| Pearson Chi-Square           | 23,695 <sup>a</sup> | 5  | ,000                              |
| Likelihood Ratio             | 11,277              | 5  | ,046                              |
| Linear-by-Linear Association | 3,899               | 1  | ,048                              |
| N of Valid Cases             | 648                 |    |                                   |

a. 5 cells (41,7%) have expected count less than 5. The minimum expected count is ,17.

```
DATASET ACTIVATE DataSet2.
```

```
SAVE OUTFILE='C:\Users\mm\Documents\CONGRESOS 2017 Treballs\EUROPEO LONDON  
2017 VACUNAS '+
```

```
'UROMUNE\VACUNAS_Base Dades_BMC.sav'
```

```
/COMPRESSED.
```

```
DATASET ACTIVATE DataSet1.
```

```
DATASET CLOSE DataSet2.
```
